# Supplementary material for: Interaction of uranium(vi) with lipopolysaccharide
Source: Royal Society of Chemistry journal article supplement (doi:10.1039/b715669c), 2008-01-01
Supplement: b715669c.pdf [file b715669c.pdf]

## Interaction of uranium(VI) with lipopolysaccharide

Astrid Barkleit\*, Henry Moll and Gert Bernhard

\*Institute of Radiochemistry, Forschungszentrum Dresden-Rossendorf e.V., P.O box 510119, D-01314 Dresden, Germany. E-mail:

a.barkleit@fzd.de, Fax: +49 351 260 3553; Tel: +49 351 260 2148

### Supplementary Data

Table S1: Summary of all TRLFS measurement series

| pH   | c[U] (M) | c[LPS] (g/L) | t <sub>1</sub>    | t <sub>2</sub>    | Peak maxima (nm) |       |       |       |       | Comments |                                                                    |
|------|----------|--------------|-------------------|-------------------|------------------|-------|-------|-------|-------|----------|--------------------------------------------------------------------|
| 2.53 | 1.0E-05  | 0.000        | 1566(A)           |                   | 488.9            | 510.5 | 533.5 | 560.1 |       |          | (A) UO <sub>2</sub> <sup>2+</sup>                                  |
| 2.53 | 1.0E-05  | 0.000        | 1773(A)           |                   | 488.8            | 510.4 | 532.9 | 559.0 | 583.8 |          |                                                                    |
| 4.78 | 1.0E-05  | 0.000        | 835(A)            | 7997(B)           | 477.1            | 500.1 | 520.6 | 542.1 | 572.7 |          | (B) UO <sub>2</sub> OH <sup>+</sup> /                              |
| 5.40 | 1.0E-05  | 0.000        | 3609(B)           | 21561(C)          | 500.5            | 516.9 | 534.8 | 559.5 | 586.8 |          | (UO <sub>2</sub> ) <sub>2</sub> (OH) <sub>2</sub>                  |
| 5.95 | 1.0E-05  | 0.000        | 6018(B)           | 28637(C)          | 501.3            | 515.2 | 532.5 | 560.1 | 587.9 |          | (C) (UO <sub>2</sub> ) <sub>3</sub> (OH) <sub>5</sub> <sup>+</sup> |
| 7.03 | 1.0E-05  | 0.000        |                   | 29611(C)          | 503.6            | 517.1 | 533.8 | 557.6 | 590.5 |          |                                                                    |
| 2.55 | 1.0E-05  | 0.050        | n.m.              |                   | 481.4            | 497.5 | 519.0 | 542.6 | 567.7 | 598.4    | n.m. lifetime not measured                                         |
| 2.55 | 1.0E-05  | 0.075        | n.m.              |                   | 480.9            | 497.4 | 518.9 | 542.7 | 567.4 | 592.5    |                                                                    |
| 2.51 | 1.0E-05  | 0.100        | 1635 <sup>A</sup> | 8532 <sup>1</sup> | 480.7            | 497.3 | 518.9 | 542.8 | 567.4 | 595.6    | (1) R–O–PO <sub>3</sub> H–UO <sub>2</sub> <sup>+</sup>             |
| 2.58 | 1.0E-05  | 0.200        | 1459 <sup>A</sup> | 9467 <sup>1</sup> | 480.5            | 497.3 | 519.1 | 542.7 | 567.2 | 597.2    |                                                                    |
| 2.55 | 1.0E-05  | 0.500        | 1193 <sup>A</sup> | 7475 <sup>1</sup> | 480.8            | 497.3 | 518.7 | 542.1 | 566.6 | 595.6    |                                                                    |
| 2.56 | 1.0E-05  | 0.750        | 1766 <sup>A</sup> | 8401 <sup>1</sup> | 480.5            | 497.1 | 518.8 | 542.3 | 566.5 | 597.0    |                                                                    |
| 2.56 | 1.0E-05  | 1.000        | 1890 <sup>A</sup> | 8120 <sup>1</sup> | 480.3            | 497.2 | 518.8 | 542.5 | 567.0 | 595.4    |                                                                    |
| 3.35 | 1.0E-05  | 0.100        | 1411 <sup>A</sup> | 7868 <sup>1</sup> | 480.8            | 497.8 | 519.1 | 542.8 | 568.4 | 596.5    |                                                                    |
| 3.21 | 1.0E-05  | 1.000        | 1728 <sup>A</sup> | 7304 <sup>1</sup> | 484.2            | 498.6 | 519.6 | 543.2 | 568.0 | 595.5    |                                                                    |
| 3.35 | 5.0E-05  | 1.000        | 1308 <sup>A</sup> | 7928 <sup>1</sup> | 481.9            | 498.3 | 519.8 | 543.3 | 568.2 | 596.3    |                                                                    |

Supplementary information (ESI) for *Dalton Trans.*  
 This journal is © The Royal Society of Chemistry 2008

|      |         |       |                   |                    |       |       |       |       |       |       |                                                                                                                    |
|------|---------|-------|-------------------|--------------------|-------|-------|-------|-------|-------|-------|--------------------------------------------------------------------------------------------------------------------|
| 3.30 | 1.0E-04 | 1.000 | n.m.              |                    | 481.6 | 498.2 | 519.6 | 543.1 | 567.6 | 596.7 |                                                                                                                    |
| 3.95 | 1.0E-05 | 0.025 | n.m.              |                    | 486.0 | 499.4 | 520.5 | 544.6 | 568.7 | 598.7 | (2) R–O–PO <sub>3</sub> –UO <sub>2</sub><br>(3) (R–O–PO <sub>3</sub> ) <sub>2</sub> –UO <sub>2</sub> <sup>2-</sup> |
| 4.01 | 1.0E-05 | 0.050 | n.m.              |                    | 481.1 | 498.7 | 520.1 | 543.3 | 567.1 | 598.3 |                                                                                                                    |
| 4.02 | 1.0E-05 | 0.075 | n.m.              |                    | 482.4 | 498.9 | 520.4 | 543.8 | 568.0 | 595.4 |                                                                                                                    |
| 4.03 | 1.0E-05 | 0.100 | 1039 <sup>2</sup> | 13210 <sup>3</sup> | 483.0 | 499.7 | 520.6 | 543.8 | 567.8 | 595.9 |                                                                                                                    |
| 4.04 | 1.0E-05 | 0.200 | 932 <sup>2</sup>  | 12058 <sup>3</sup> | 483.2 | 499.5 | 520.5 | 543.8 | 567.7 | 596.8 |                                                                                                                    |
| 4.02 | 1.0E-05 | 0.500 | 680 <sup>2</sup>  | 11866 <sup>3</sup> | 484.3 | 499.6 | 520.6 | 543.9 | 567.2 | 598.4 |                                                                                                                    |
| 4.05 | 1.0E-05 | 0.750 | 1066 <sup>2</sup> | 10839 <sup>3</sup> | 483.2 | 499.4 | 520.6 | 543.8 | 567.7 | 595.6 |                                                                                                                    |
| 4.04 | 1.0E-05 | 1.000 | 771 <sup>2</sup>  | 11298 <sup>3</sup> | 483.4 | 499.5 | 520.6 | 543.9 | 568.1 | 596.0 |                                                                                                                    |
| 6.94 | 1.0E-05 | 0.025 | n.m.              |                    |       | 503.7 | 522.9 | 543.5 | 569.5 |       | U-Hydroxide                                                                                                        |
| 6.96 | 1.0E-05 | 0.050 | 1426 <sup>2</sup> | 12200 <sup>3</sup> |       | 501.9 | 521.8 | 542.3 | 569.7 |       | U-Hydroxide                                                                                                        |
| 6.94 | 1.0E-05 | 0.075 | 1810 <sup>2</sup> | 14267 <sup>3</sup> | 483.5 | 499.6 | 520.4 | 543.1 | 566.5 | 597.8 |                                                                                                                    |
| 7.00 | 1.0E-05 | 0.100 | 1104 <sup>2</sup> | 12266 <sup>3</sup> | 482.5 | 499.0 | 520.5 | 544.0 | 568.7 | 597.3 |                                                                                                                    |
| 6.96 | 1.0E-05 | 0.200 | n.m.              |                    | 483.2 | 499.5 | 520.9 | 544.4 | 569.1 | 595.4 |                                                                                                                    |
| 7.05 | 1.0E-05 | 0.500 | n.m.              |                    | 483.9 | 499.9 | 521.2 | 544.5 | 569.0 | 597.3 |                                                                                                                    |
| 6.95 | 1.0E-05 | 0.750 | 1349 <sup>2</sup> | 13532 <sup>3</sup> | 483.7 | 500.0 | 521.3 | 544.7 | 569.6 | 599.5 |                                                                                                                    |
| 7.02 | 1.0E-05 | 1.000 | 871 <sup>2</sup>  | 14248 <sup>3</sup> | 483.7 | 500.0 | 521.3 | 544.7 | 569.4 | 597.1 |                                                                                                                    |
| 7.00 | 1.0E-05 | 0.100 | 293               | 9218 <sup>3</sup>  | 483.9 | 499.5 | 520.6 | 544.1 | 568.2 | 597.0 |                                                                                                                    |
| 7.01 | 1.0E-05 | 1.000 | 312               | 21651 <sup>3</sup> | 483.9 | 499.7 | 520.7 | 544.2 | 568.4 | 595.7 |                                                                                                                    |
| 7.00 | 5.0E-05 | 1.000 | 1198 <sup>2</sup> | 16232 <sup>3</sup> | 483.5 | 499.6 | 520.7 | 544.0 | 568.0 | 594.3 |                                                                                                                    |
| 6.97 | 1.0E-04 | 1.000 | 1505 <sup>2</sup> | 22462 <sup>3</sup> | 483.2 | 499.5 | 520.7 | 543.8 | 567.1 | 594.9 |                                                                                                                    |
| 9.01 | 1.0E-05 | 1.000 | 4720              | 29436              | 482.6 | 499.4 | 520.7 | 542.6 | 561.6 | 599.6 | U-Hydroxide                                                                                                        |
| 8.65 | 5.0E-05 | 1.000 | 7513              | 37361              | 482.8 | 499.4 | 520.6 | 543.3 | 564.5 | 592.5 | U-Hydroxide                                                                                                        |
| 8.78 | 1.0E-04 | 1.000 | 8116              | 42873              | 480.0 | 501.1 | 521.5 | 543.2 | 565.0 | 592.3 | U-Hydroxide                                                                                                        |
| 2.43 | 1.0E-05 | 0.025 | 1532              |                    |       | 496.6 | 518.2 | 540.9 | 567.6 |       |                                                                                                                    |
| 2.40 | 1.0E-05 | 0.050 | 1237              |                    | 482.6 | 497.5 | 518.8 | 541.9 | 568.0 |       |                                                                                                                    |
| 2.44 | 1.0E-05 | 0.075 | 1887              | 9066 <sup>1</sup>  | 482.0 | 497.6 | 519.2 | 542.3 | 568.6 |       |                                                                                                                    |
| 2.47 | 1.0E-05 | 0.100 | 1620              | 9020 <sup>1</sup>  | 480.8 | 497.3 | 519.0 | 542.5 | 568.7 |       |                                                                                                                    |
| 2.53 | 1.0E-05 | 0.250 | 1722              | 8100 <sup>1</sup>  | 481.6 | 497.5 | 519.1 | 542.3 | 568.6 |       |                                                                                                                    |
| 2.42 | 1.0E-05 | 0.500 | 1926              | 8132 <sup>1</sup>  | 481.4 | 497.4 | 518.9 | 542.1 | 569.2 |       |                                                                                                                    |
| 2.40 | 1.0E-05 | 1.000 | 1800              | 8844 <sup>1</sup>  | 481.3 | 497.4 | 519.0 | 542.3 | 569.0 |       |                                                                                                                    |
| 4.05 | 1.0E-05 | 0.025 | 1007 <sup>2</sup> |                    | 479.9 | 498.3 | 520.4 | 542.4 | 567.2 | 602.3 |                                                                                                                    |
| 4.00 | 1.0E-05 | 0.050 | 567 <sup>2</sup>  | 12574 <sup>3</sup> | 481.4 | 497.6 | 519.1 | 542.0 | 566.6 | 596.2 |                                                                                                                    |
| 4.10 | 1.0E-05 | 0.075 | 1281 <sup>2</sup> | 11956 <sup>3</sup> | 483.9 | 498.1 | 519.2 | 542.5 | 568.0 |       |                                                                                                                    |
| 4.03 | 1.0E-05 | 0.100 | 1309 <sup>2</sup> | 14240 <sup>3</sup> | 482.0 | 497.7 | 518.8 | 542.1 | 567.6 | 596.6 |                                                                                                                    |
| 4.09 | 1.0E-05 | 0.250 | 852 <sup>2</sup>  | 11254 <sup>3</sup> | 482.5 | 498.4 | 519.3 | 542.5 | 568.1 | 596.4 |                                                                                                                    |
| 4.05 | 1.0E-05 | 0.500 | 1236 <sup>2</sup> | 12966 <sup>3</sup> | 483.1 | 498.7 | 520.0 | 542.9 | 567.4 | 596.4 |                                                                                                                    |

Supplementary information (ESI) for *Dalton Trans.*  
 This journal is © The Royal Society of Chemistry 2008

|      |         |       |                   |                    |       |       |       |       |       |       |             |
|------|---------|-------|-------------------|--------------------|-------|-------|-------|-------|-------|-------|-------------|
| 4.05 | 1.0E-05 | 1.000 | 1284 <sup>2</sup> | 12904 <sup>3</sup> | 483.3 | 498.8 | 519.8 | 543.1 | 568.2 | 596.0 |             |
| 6.05 | 1.0E-05 | 0.075 | 2517 <sup>2</sup> | 15354 <sup>3</sup> | 483.5 | 499.5 | 520.3 | 543.1 | 566.2 |       |             |
| 6.12 | 1.0E-05 | 0.100 | 1503 <sup>2</sup> | 14358 <sup>3</sup> | 482.3 | 498.4 | 519.7 | 542.5 | 567.2 | 597.1 |             |
| 6.03 | 1.0E-05 | 0.250 | 1062 <sup>2</sup> | 15168 <sup>3</sup> | 483.1 | 498.9 | 519.8 | 542.7 | 567.9 | 596.8 |             |
| 6.12 | 1.0E-05 | 0.500 | 792 <sup>2</sup>  | 14986 <sup>3</sup> | 483.5 | 498.8 | 519.7 | 542.7 | 567.9 | 596.8 |             |
| 6.09 | 1.0E-05 | 1.000 | 1029 <sup>2</sup> | 13400 <sup>3</sup> | 483.6 | 499.0 | 519.7 | 542.8 | 568.0 | 595.7 |             |
| 2.40 | 1.0E-05 | 1.000 | 1794 <sup>A</sup> | 7835 <sup>1</sup>  | 481.3 | 497.4 | 519.0 | 542.3 | 569.0 |       |             |
| 3.55 | 1.0E-05 | 1.000 | 852 <sup>2</sup>  | 11022 <sup>3</sup> | 482.1 | 498.7 | 519.6 | 542.5 | 567.8 | 601.5 |             |
| 4.03 | 1.0E-05 | 1.000 | 1238 <sup>2</sup> | 10904 <sup>3</sup> | 483.3 | 498.8 | 519.8 | 543.1 | 568.2 | 596.0 |             |
| 6.05 | 1.0E-05 | 1.000 | 1029 <sup>2</sup> | 13400 <sup>3</sup> | 483.6 | 499.0 | 519.7 | 542.8 | 568.0 | 595.7 |             |
| 6.55 | 1.0E-05 | 1.000 | 1206 <sup>2</sup> | 15066 <sup>3</sup> | 483.4 | 499.2 | 519.8 | 542.5 | 568.1 | 599.0 |             |
| 7.01 | 1.0E-05 | 1.000 | 1266 <sup>2</sup> | 15258 <sup>3</sup> | 484.2 | 499.6 | 520.2 | 543.0 | 568.3 | 599.2 |             |
| 8.00 | 1.0E-05 | 1.000 | 912 <sup>2</sup>  | 14296 <sup>3</sup> | 478.1 | 498.9 | 520.7 | 542.8 | 571.0 |       |             |
| 2.44 | 1.0E-05 | 0.075 | 1887 <sup>A</sup> | 8066 <sup>1</sup>  | 482.0 | 497.6 | 519.2 | 542.3 | 568.6 |       |             |
| 3.13 | 1.0E-05 | 0.075 | 1002 <sup>A</sup> | 8250 <sup>1</sup>  | 483.3 | 498.2 | 519.1 | 542.7 | 568.7 |       |             |
| 4.10 | 1.0E-05 | 0.075 | 1281 <sup>2</sup> | 12956 <sup>3</sup> | 483.9 | 498.1 | 519.2 | 542.5 | 568.0 |       |             |
| 4.74 | 1.0E-05 | 0.075 | 1263 <sup>2</sup> | 12524 <sup>3</sup> | 481.1 | 498.7 | 520.2 | 541.8 | 569.9 |       |             |
| 5.22 | 1.0E-05 | 0.075 | 1035 <sup>2</sup> | 15038 <sup>3</sup> | 484.2 | 498.6 | 519.3 | 542.6 | 568.0 |       |             |
| 6.05 | 1.0E-05 | 0.075 | 2517 <sup>2</sup> | 15354 <sup>3</sup> | 483.5 | 499.5 | 520.3 | 543.1 | 566.2 |       |             |
| 7.37 | 1.0E-05 | 0.075 | 4698              | 29636              | 484.2 | 500.2 | 521.2 | 543.9 | 567.8 | 597.4 | U-Hydroxide |
